# Supplementary material for: CdS QDs decorated on 3D flower-like Sn3O4: a hierarchical photocatalyst with boosted charge separation for hydrogen production
Source: Royal Society of Chemistry journal article supplement (doi:10.1039/d3nj03611a), 2023-11-20
Supplement: d3nj03611a1.pdf [file d3nj03611a1.pdf]

## ***Supporting Information***

### **CdS QDs decorated on 3D flower-like Sn<sub>3</sub>O<sub>4</sub>: A hierarchical photocatalyst with boosted charge separation for hydrogen production**

*Pengfei Tan<sup>a</sup>, Lu Yang\*<sup>b</sup>, Hele Liu<sup>b</sup>, Yi Zhang<sup>a, b</sup>, Binhua Zhou<sup>a</sup>, Jun Pan\*<sup>a</sup>*

*<sup>a</sup> State Key Laboratory for Powder Metallurgy, Central South University, Changsha 410083, P. R. China*

*<sup>b</sup> Hunan Key Laboratory of Applied Environmental Photocatalysis, Changsha University, Changsha 410022, P. R. China*

*\* To whom correspondence should be addressed: [z20180829@ccsu.edu.cn](mailto:z20180829@ccsu.edu.cn);*

*[jun.pan@csu.edu.cn](mailto:jun.pan@csu.edu.cn)*

## **Material characterization**

X-ray diffractometer (XRD) with scanning angles ranging from 10° to 80° was used to obtain the phase composition information of the samples. The surface chemical compositions were analyzed by X-ray photoelectron spectroscopy (XPS). Scanning electron microscopy (SEM) of Helios NanoLab G3 UC and transmission electron microscopy (TEM, Titan G2 60-300) were used to detect the microstructure and morphology of the samples. Thermo Fisher Evolution 220 was used to obtain UV-vis diffuse reflectance spectra. The photoluminescence spectrum (PL) was obtained by PerkinElmer LS 55 fluorescence spectrophotometer (excitation wavelength 295 nm). Electron paramagnetic resonance (EPR) signals were measured on the Bruker EMXplus-6/1 spectrometer. And the time-resolved photoluminescence (TR-PL) spectra were obtained by Edinburgh FLS1000.

## **Photocatalytic performance test**

The performance of the photocatalyst was assessed by the data of photocatalytic hydrogen production. First, 50 mg of photocatalyst, 20 mL of methanol, 80 mL of water were added to the quartz reactor. Then the solution in the reactor was ultrasonicated and stirred until it was completely dispersed. After that, the quartz reactor was connected to a closed circulating vacuum system. Circulating condensate was introduced and the temperature was set to 10 °C. In the whole experiment, 300 W Xenon lamp with a filter ( $\lambda \geq 420$  nm) was used as the light source for light irradiation. The H<sub>2</sub> yield of the photocatalyst was analyzed by gas chromatograph (GC4000).

## **Photoelectrochemical measurement**

Electrochemical tests were performed on CHI 660E electrochemical workstation to compare the photoelectrochemical properties of the prepared photocatalysts. The standard three-electrode system was used for testing. Platinum plate and saturated Ag/AgCl electrode played as the counter electrode and the reference electrode, respectively. Fluorine-doped tin dioxide (FTO) glass coated with the prepared sample acted as the working electrode. The electrolyte was 0.2 M Na<sub>2</sub>SO<sub>4</sub> solution, and the

light source was 300 W Xenon lamp. The working electrode was prepared as follows: First, 5 mg of catalyst was dissolved in 2 mL of ethylene glycol and 200 L of Nafion under magnetic agitation for 24 hours. Then, 100 mL of the suspension was deposited on FTO (1 cm × 1 cm) glass, which was then heated to 80 °C and dried. Photocurrent response curves (I-t curves) were measured with a bias voltage of 0.1 V. The electrochemical impedance spectra (EIS) were obtained when the frequency range was set to 0.1-10<sup>5</sup> Hz with an amplitude of 5 mV. At 1000 Hz, the Mott-Schottky (M-S) curves were examined with a measurement voltage ranging from -1.5 V to 1.0 V and an amplitude of 10 mV.

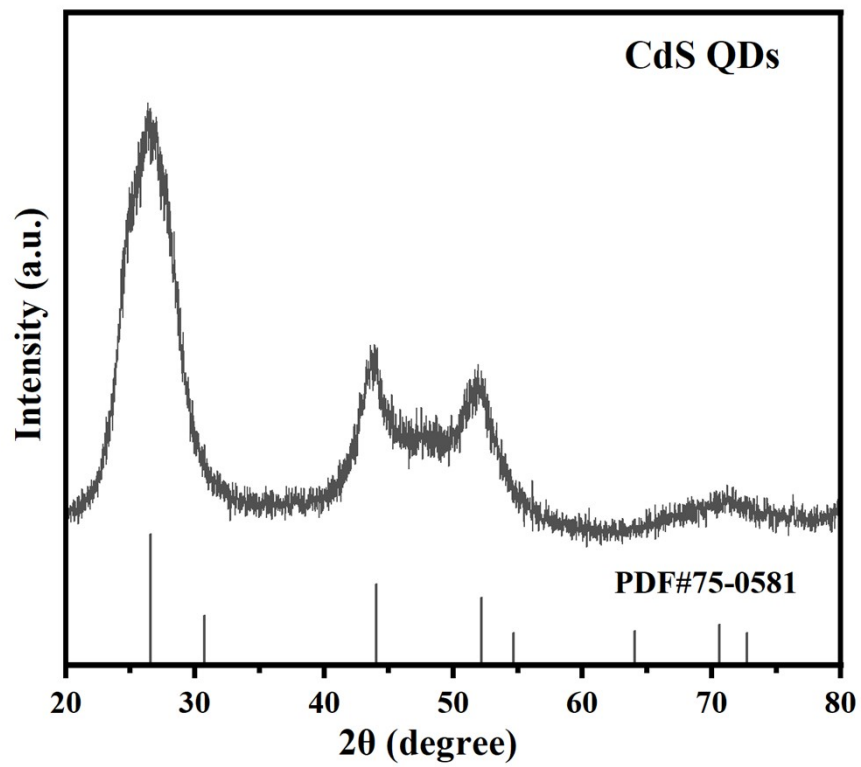

Fig. S1. XRD pattern of pure CdS QDs.

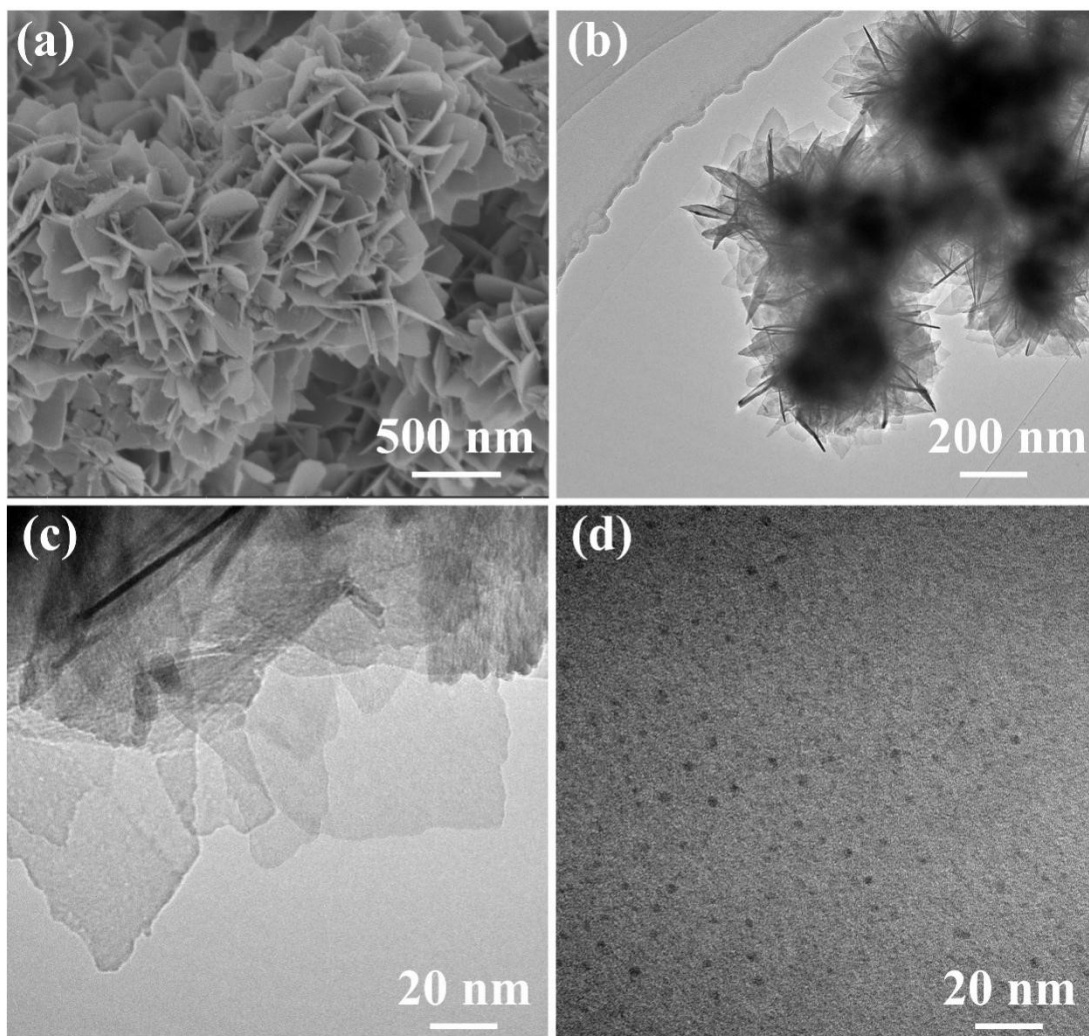

**Fig. S2.** SEM (a) and TEM (b, c) images of pure  $\text{Sn}_3\text{O}_4$ . TEM (d) image of pure CdS QDs.

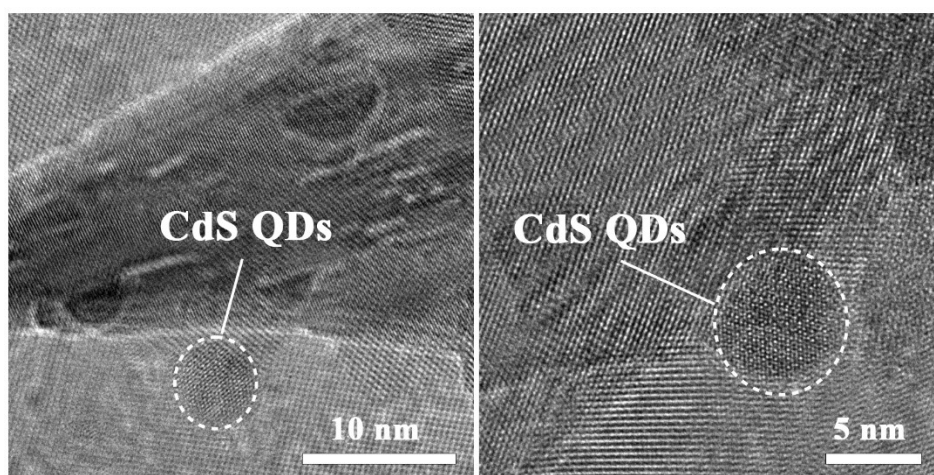

**Fig. S3.** TEM images of  $\text{Sn}_3\text{O}_4/\text{CdS}$  QDs-2

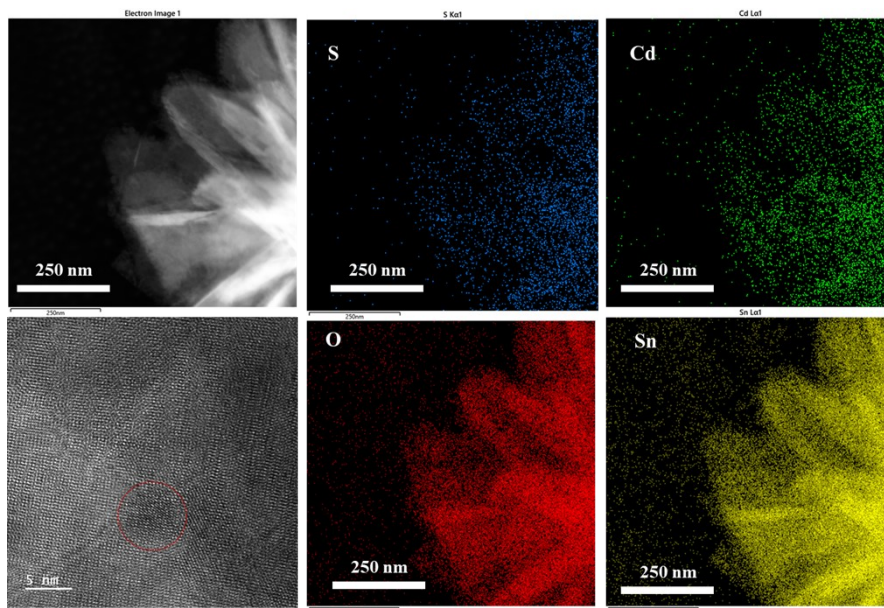

**Fig. S4.** HAADF and EDS mapping images of Sn, O, Cd, and S in  $\text{Sn}_3\text{O}_4/\text{CdS}$  QDs-2.

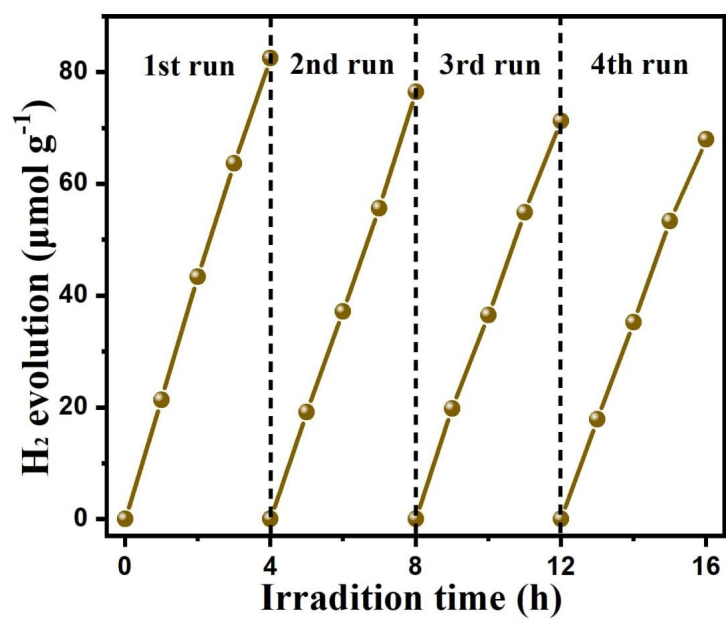

**Fig. S5.** Recyclability of H<sub>2</sub> evolution of the  $\text{Sn}_3\text{O}_4/\text{CdS}$  QDs-2 composite.

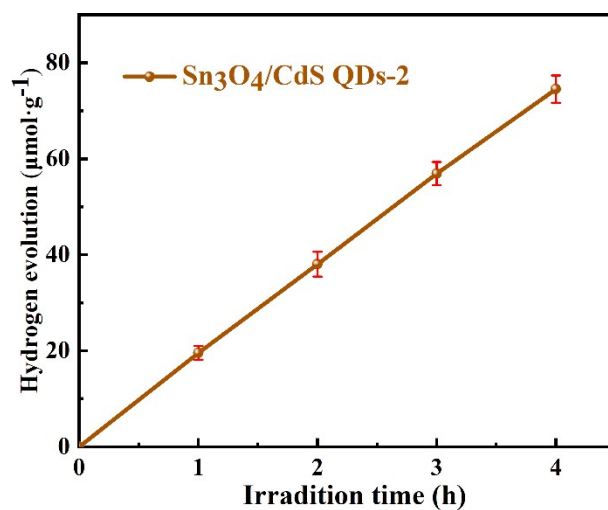

Fig. S6. The photocatalytic  $\text{H}_2$  evolution curve of  $\text{Sn}_3\text{O}_4/\text{CdS}$  QDs-2 with error bar.

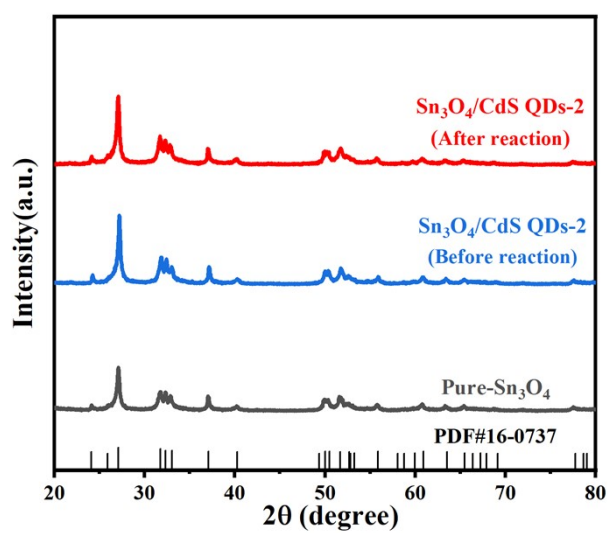

Fig. S7. XRD patterns of pure  $\text{Sn}_3\text{O}_4$  and  $\text{Sn}_3\text{O}_4/\text{CdS}$  QDs-2 after photocatalytic reaction.

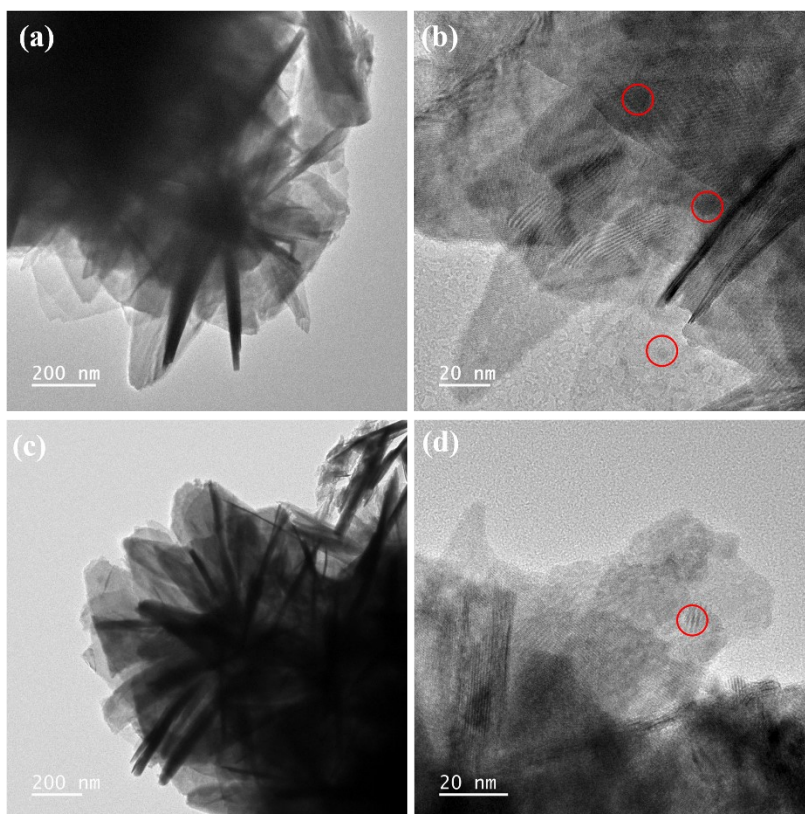

**Fig. S8.** TEM images of  $\text{Sn}_3\text{O}_4/\text{CdS}$  QDs-2 (a, b) before photocatalytic reaction, (c, d) after photocatalytic reaction



**Table S1** The average crystallite sizes of pure Sn<sub>3</sub>O<sub>4</sub> and Sn<sub>3</sub>O<sub>4</sub>/CdS QDs samples.

| Crystallite size                          | nm    |
|-------------------------------------------|-------|
| Sn <sub>3</sub> O <sub>4</sub>            | 25.96 |
| Sn <sub>3</sub> O <sub>4</sub> /CdS QDs-1 | 26.46 |
| Sn <sub>3</sub> O <sub>4</sub> /CdS QDs-2 | 32.49 |
| Sn <sub>3</sub> O <sub>4</sub> /CdS QDs-3 | 32.81 |
| Sn <sub>3</sub> O <sub>4</sub> /CdS QDs-4 | 31.20 |

The average crystallite sizes are obtained by the Scherer's formula.

**Table S2** Summary of hydrogen evolution rates of Sn<sub>3</sub>O<sub>4</sub>-based materials in recent studies

| Catalyst                                                   | Reaction Solution                      | H <sub>2</sub> evolution rate<br>( $\mu\text{mol g}^{-1} \text{h}^{-1}$ ) | Light source                                    | Ref.      |
|------------------------------------------------------------|----------------------------------------|---------------------------------------------------------------------------|-------------------------------------------------|-----------|
| Sn <sub>3</sub> O <sub>4</sub> /CdS QDs-2                  | CH <sub>3</sub> OH aqueous<br>solution | 20.74                                                                     | Visible light<br>( $\lambda > 420 \text{ nm}$ ) | This work |
| Sn <sub>3</sub> O <sub>4</sub> /rGO                        | CH <sub>3</sub> OH aqueous<br>solution | 20.00                                                                     | Visible light<br>( $\lambda > 420 \text{ nm}$ ) | 1         |
| BiVO <sub>4</sub> -QD@Sn <sub>3</sub> O <sub>4</sub>       | CH <sub>3</sub> OH aqueous<br>solution | 12.10                                                                     | Simulated<br>sunlight                           | 2         |
| Ni-Sn <sub>3</sub> O <sub>4</sub>                          | CH <sub>3</sub> OH aqueous<br>solution | 25.6                                                                      | Visible light<br>( $\lambda > 420 \text{ nm}$ ) | 3         |
| Sn <sub>3</sub> O <sub>4</sub> /NiS                        | CH <sub>3</sub> OH aqueous<br>solution | 17.43                                                                     | Visible light<br>( $\lambda > 420 \text{ nm}$ ) | 4         |
| Sn <sub>3</sub> O <sub>4</sub> /TiO <sub>2</sub>           | CH <sub>3</sub> OH aqueous<br>solution | 19.00                                                                     | Visible light<br>( $\lambda > 420 \text{ nm}$ ) | 5         |
| Sn <sub>3</sub> O <sub>4</sub> /Pt                         | CH <sub>3</sub> OH aqueous<br>solution | 16.66                                                                     | Visible light<br>( $\lambda > 420 \text{ nm}$ ) | 6         |
| Sn <sub>3</sub> O <sub>4</sub>                             | CH <sub>3</sub> OH aqueous<br>solution | 9.00                                                                      | Visible light<br>( $\lambda > 400 \text{ nm}$ ) | 7         |
| Phosphoric acid<br>modified Sn <sub>3</sub> O <sub>4</sub> | Overall water<br>splitting             | 9.60                                                                      | Simulated<br>sunlight                           | 8         |
| Ultrathin nanosheet<br>Sn <sub>3</sub> O <sub>4</sub>      | CH <sub>3</sub> OH aqueous<br>solution | 15.50                                                                     | Visible light<br>( $\lambda > 400 \text{ nm}$ ) | 9         |

**Table S3** The fitting results of the TR-PL decay curve.

| Samples                                   | $\tau_1$ (ns) | $A_1$ | $\tau_2$ (ns) | $A_2$ | $\tau_{av}$ (ns) |
|-------------------------------------------|---------------|-------|---------------|-------|------------------|
| Sn <sub>3</sub> O <sub>4</sub>            | 0.87          | 1.03  | 6.18          | 0.03  | 1.78             |
| Sn <sub>3</sub> O <sub>4</sub> /CdS QDs-2 | 0.76          | 1.02  | 6.62          | 0.04  | 2.25             |
| CdS QDs                                   | 0.84          | 1.01  | 4.12          | 0.04  | 1.37             |

The average lifetime ( $\tau_{av}$ ) is obtained by the equation:  $\tau_{av} = (A_1\tau_1^2 + A_2\tau_2^2)/(A_1\tau_1 + A_2\tau_2)$ .

## Reference

1. X. Yu, Z. Zhao, D. Sun, N. Ren, J. Yu, R. Yang, H. Liu, *Appl. Catal., B.*, 2018, **227**, 470-476.
2. L. Chen, C. Hou, Z. Liu, Y. Qu, M. Xie, W. Han, *Chem. Commun.*, 2020, **56**, 13884-13887.
3. R. Yang, Y. Ji, L. Wang, G. Song, A. Wang, L. Ding, N. Ren, Y. Lv, J. Zhang, X. Yu, *ACS Appl. Nano Mater.*, 2020, **3**, 9268-9275.
4. H. Liu, P. Tan, H. Zhai, M. Zhang, J. Chen, R. Ren, Z. Wang, J. Pan, *New J. Chem.*, 2022, **46**, 14043-14051.
5. X. Yu, L. Wang, J. Zhang, W. Guo, Z. Zhao, Y. Qin, X. Mou, A. Li, H. Liu, *J. Mater. Chem. A.*, 2015, **3**, 19129-19136.
6. M. Manikandan, T. Tanabe, P. Li, S. Ueda, G. V. Ramesh, R. Kodiyath, J. Wang, T. Hara, A. Dakshanamoorthy, S. Ishihara, K. Ariga, J. Ye, N. Umezawa and H. Abe, *ACS Appl. Mater. Interfaces*, 2014, **6**, 3790-3793.
7. T. Tanabe, T. Tanikawa, K. Nakamori, S. Ueda, B. Nanzai, Y. Matsubara and F. Matsumoto, *Int. J. Hydrogen Energy*, 2020, **45**, 28607-28615.
8. L. Chen, S. Yue, J. Wang, W. Chen, Y. Zhang, M. Xie and W. Han, *Appl. Catal., B*, 2021, **299**, 120689.
9. T. Tanabe, K. Nakamori, T. Tanikawa, Y. Matsubara and F. Matsumoto, *J. Photochem. Photobiol., A*, 2021, **420**, 113486.
